# Supplementary material for: Kinematic and Kinetic Patterns Related to Free-Walking in Parkinson’s Disease
Source: MDPI journal article supplement (doi:10.3390/s18124224), 2018-12-01
Supplement: s1 [file s1]

**Supplementary Table S1.** Overall accuracy (ACC), sensitivity (SEN) and specificity (SPE) in gait detection of the predictive models with different predictors' datasets while validated in a leave-one out scheme. Characteristics of the classifiers: Coarse tree- Split Criterion = 'gdi', MaxNumSplits = 4; Linear SVM- Kernel function = Linear, Kernel scale = automatic, Box constraint level = 1, Multiclass method = one-vs-one, Standardize data = true; Quadratic SVM- Kernel function = Quadratic, Kernel scale = automatic, Box constraint level = 1, Multiclass method = one-vs-one, Standardize data = true; Cubic SVM- Kernel function = Cubic, Kernel scale = automatic, Box constraint level = 1, Multiclass method = one-vs-one, Standardize data = true; Fine KNN- Number of neighbors = 1, Distance metric = Euclidean, Distance weight = true ; Medium KNN- Number of neighbors = 10, Distance metric = Euclidean, Distance weight = true; Cubic KNN- Number of neighbors = 10, Distance metric = Minkowski, Distance weight = true; Cosine KNN- Number of neighbors = 10, Distance metric = Cosine, Distance weight = true; Linear Discriminant: Covariance structure: full; A 39-fold (i.e., leave-one out) cross validation scheme was employed for all the analyses.

| Predictive model    |     | Kinematics | Kinetics | Kinematics<br>+ Kinetics | All<br>parameters |
|---------------------|-----|------------|----------|--------------------------|-------------------|
| Coarse Tree         | ACC | 46.2       | 25.6     | 48.7                     | 43.6              |
|                     | SEN | 36.4       | 30.8     | 44.4                     | 37.5              |
|                     | SPE | 50.0       | 23.1     | 50.0                     | 45.2              |
| Linear SVM          | ACC | 61.6       | 38.5     | 51.3                     | 53.9              |
|                     | SEN | 50.0       | 30.0     | 33.3                     | 36.4              |
|                     | SPE | 65.6       | 41.4     | 59.3                     | 60.7              |
| Quadratic SVM       | ACC | 48.7       | 28.2     | 53.9                     | 48.7              |
|                     | SEN | 31.2       | 26.7     | 36.4                     | 25.0              |
|                     | SPE | 60.9       | 29.2     | 60.7                     | 59.3              |
| Cubic SVM           | ACC | 53.9       | 30.8     | 48.7                     | 48.7              |
|                     | SEN | 36.4       | 25.0     | 30.8                     | 30.8              |
|                     | SPE | 60.7       | 33.3     | 57.7                     | 57.7              |
| Fine KNN            | ACC | 43.6       | 35.9     | 38.5                     | 43.6              |
|                     | SEN | 23.1       | 35.7     | 30.0                     | 27.3              |
|                     | SPE | 53.9       | 36.0     | 41.4                     | 50.0              |
| Medium KNN          | ACC | 53.9       | 56.4     | 51.3                     | 51.3              |
|                     | SEN | 50.0       | 37.5     | 36.4                     | 33.3              |
|                     | SPE | 56.5       | 61.3     | 57.1                     | 62.5              |
| Cubic KNN           | ACC | 53.9       | 56.4     | 51.3                     | 43.6              |
|                     | SEN | 43.8       | 45.5     | 28.6                     | 18.2              |
|                     | SPE | 60.9       | 60.7     | 56.3                     | 53.6              |
| Cosine KNN          | ACC | 51.3       | 51.3     | 51.3                     | 59.0              |
|                     | SEN | 37.5       | 55.6     | 42.9                     | 45.5              |
|                     | SPE | 54.8       | 50.0     | 53.1                     | 64.3              |
| Linear Discriminant | ACC | 43.6       | 41.0     | 43.6                     | 64.1              |
|                     | SEN | 35.7       | 30.8     | 38.5                     | 47.1              |
|                     | SPE | 48.0       | 46.2     | 46.2                     | 77.3              |

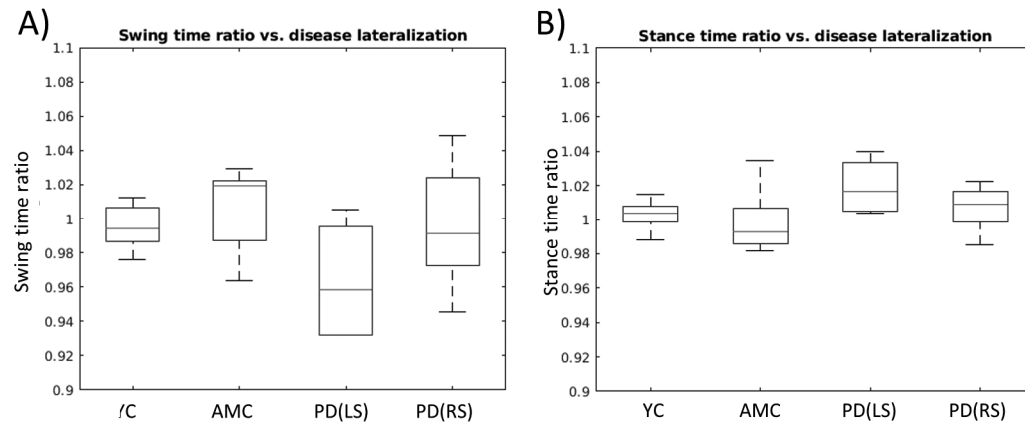

**Supplementary Figure S1.** Boxplots of the (A) swing time ratio and (B) stance time ratio (normalized to the right foot) across stepping movements and groups while considering disease lateralization in PD patients. Abbreviations: RS = right side. LS = left side.
